# Supplementary material for: Glycemia Lowering Effect of an Aqueous Extract of Hedychium coronarium Leaves in Diabetic Rodent Models
Source: PubMed Central journal article supplement (PMC6470712; doi:10.3390/nu11030629), 2019-03-14
Supplement: nutrients-11-00629-s001.pdf [file nutrients-11-00629-s001.pdf]

**Supplementary Materials:**
**Table S1.** *p*-Value of oral glucose tolerance test (OGTT) after administrating *Hedychium coronarium* (HC) and SugarOut (SO) in STZ-induced type 2 diabetes model (T2DM; *N* = 8).

| <i>t</i> (min) | 0 | 30    | 60    | 90    | 120   |
|----------------|---|-------|-------|-------|-------|
| 14 days        |   |       |       |       |       |
| Control        | - | -     | --    | -     | -     |
| HC             | - | -     | -     | 0.001 | 0.007 |
| SO             | - | -     | -     | 0.001 | 0.005 |
| 28 days        |   |       |       |       |       |
| Control        | - | -     | -     | -     | -     |
| HC             | - | 0.017 | -     | -     | -     |
| SO             | - | 0.011 | 0.003 | 0.007 | 0.042 |

**Table S2.** Biochemistry analysis of STZ-T2DM after treating HC and SO for 28 days.

| Group             |       | Sham           | Control         | HC              | SO              |
|-------------------|-------|----------------|-----------------|-----------------|-----------------|
| Number of animals |       | 8              | 8               | 8               | 8               |
| Calcium           | mg/dL | 10.18 ± 0.36   | 9.03 ± 1.19     | 9.29 ± 0.62     | 8.66 ± 0.90     |
| Chloride          | mEq/L | 97.63 ± 3.96   | 83.13 ± 6.49    | 85.75 ± 3.37    | 85.75 ± 3.65    |
| Phosphorus        | mg/dL | 7.43 ± 4.48    | 11.31 ± 6.55    | 8.80 ± 1.11     | 8.31 ± 3.34     |
| Potassium         | mEq/L | 9.34 ± 4.21    | 18.44 ± 14.86   | 20.21 ± 3.49    | 15.15 ± 7.74    |
| Sodium            | mEq/L | 142.75 ± 6.36  | 123.38 ± 10.99  | 123.00 ± 3.02   | 127.00 ± 7.21   |
| Magnesium         | mg/dL | 2.88 ± 0.58    | 2.75 ± 0.60     | 2.49 ± 0.36     | 2.65 ± 0.31     |
| ALT               | U/L   | 35.25 ± 10.44  | 92.38 ± 58.40   | 80.88 ± 44.88   | 77.88 ± 23.17   |
| AST               | U/L   | 127.25 ± 54.76 | 156.13 ± 117.04 | 197.50 ± 98.55  | 162.63 ± 58.39  |
| ALP               | U/L   | 73.88 ± 21.16  | 397.75 ± 60.35  | 309.25 ± 121.27 | 446.13 ± 120.87 |
| γ-GT              | U/L   | 3.00 ± 0.00    | 4.75 ± 2.87     | 4.13 ± 1.81     | 4.13 ± 1.64     |
| T-Bil             | mg/dL | 0.20 ± 0.00    | 0.25 ± 0.14     | 0.20 ± 0.00     | 0.20 ± 0.00     |
| Creatinine        | mg/dL | 0.44 ± 0.17    | 0.75 ± 0.39     | 0.41 ± 0.06     | 0.56 ± 0.27     |
| BUN               | mg/dL | 17.88 ± 4.36   | 48.75 ± 13.26   | 29.13 ± 9.34    | 47.88 ± 20.73   |
| Total protein     | g/dL  | 5.96 ± 0.29    | 5.15 ± 0.85     | 5.11 ± 0.46     | 5.01 ± 0.23     |
| Albumin           | g/dL  | 4.10 ± 0.58    | 3.33 ± 0.34     | 3.63 ± 0.30     | 3.60 ± 0.29     |
| Globulin          | g/dL  | 1.86 ± 0.47    | 1.83 ± 0.96     | 1.49 ± 0.33     | 1.41 ± 0.28     |

ALT: alanine aminotransferase; AST: aspartate aminotransferase; ALP: Alkaline phosphatase; γ-GT: Gamma-glutamyl transferase; T-Bil: Total Bilirubin; BUN: blood urea nitrogen. Data were expressed as Mean ± S.D.
